# Supplementary material for: Targeting Non-Alcoholic Fatty Liver Disease with Hawthorn Ethanol Extract (HEE): A Comprehensive Examination of Hepatic Lipid Reduction and Gut Microbiota Modulation
Source: MDPI journal article supplement (doi:10.3390/nu16091335), 2024-04-29

# **Targeting Non-Alcoholic Fatty Liver Disease with Hawthorn Ethanol Extract (HEE): A Comprehensive Examination of Hepatic Lipid Reduction and Gut Microbiota Modulation**

Tianyu Wang<sup>1</sup>, Dawei Wang<sup>2</sup>, Yinghui Ding<sup>1</sup>, He Xu<sup>1</sup>, Yue Sun<sup>1</sup>, Jumin Hou<sup>1</sup>, Yanrong Zhang<sup>2\*</sup>

<sup>1</sup> → College of Food Science and Engineering, Changchun University; Changchun 130022, China. wangty84@ccu.edu.cn (T.W.); 220302116@ccu.edu.cn(Y.D.);

220302110@ccu.edu.cn(H.X.); 220301083@ccu.edu.cn(Y.S.); houjm@ccu.edu.cn(J.H.)

<sup>2</sup> → School of Food Science and Engineering, Jilin Agricultural University; Changchun 130118, China. wangdawei@jlau.edu.cn(D.W.)

**\*Corresponding author.**

E-mail address: zhangyanrong@jlau.edu.cn(Y.Z).

**Table S1. Composition of diets\***

| <b>Ingredient (g/kg)</b>          | <b>HFD<br/>(TP 23300)</b> | <b>LFD<br/>(TP 23302)</b> |
|-----------------------------------|---------------------------|---------------------------|
| Casein                            | 259                       | 189                       |
| Maltodextrin                      | 166                       | 108                       |
| Sucrose                           | 91                        | 67                        |
| Corn starch                       | 0                         | 497                       |
| Soybean oil                       | 33                        | 21                        |
| Lard                              | 313                       | 21                        |
| Cellulose                         | 67                        | 48                        |
| Mineral mix (M1020)               | 52                        | 36                        |
| Vitamin mix (V1010)               | 13                        | 9                         |
| L-cystine                         | 3                         | 2                         |
| Choline bitartrate                | 3                         | 2                         |
| Tertiary butylhydroquinone (TBHQ) | 0.067                     | 0.067                     |
| Total                             | 1000.067                  | 1000.067                  |

\*Diets were purchased from TROPHIC Animal Feed High-tech Co., Ltd. (Nantong, China), and information on diet composition was provided by the company.

**Table S2. Primer sequences used for real-time quantitative PCR**

| Gene  | Forward (5'-3')         | Reverse (5'-3')         | PrimerBank ID |
|-------|-------------------------|-------------------------|---------------|
| FASN  | GGAGGTGGTGATAGCCGGTAT   | TGGGTAATCCATAGAGCCCAG   | 30911099a1    |
| MGL   | CGGACTTCCAAGTTTTTGTGAGA | GCAGCCACTAGGATGGAGATG   | 6754690a1     |
| HSL   | CCAGCCTGAGGGCTTACTG     | CTCCATTGACTGTGACATCTCG  | 26325924a1    |
| ATGL  | GGATGGCGGCATTTTCAGACA   | CAAAGGGTTGGGTTGGTTCAG   | 26327465a1    |
| GAPDH | AGGTCGGTGTGAACGGATTTG   | TGTAGACCATGTAGTTGAGGTCA | 6679937a1     |

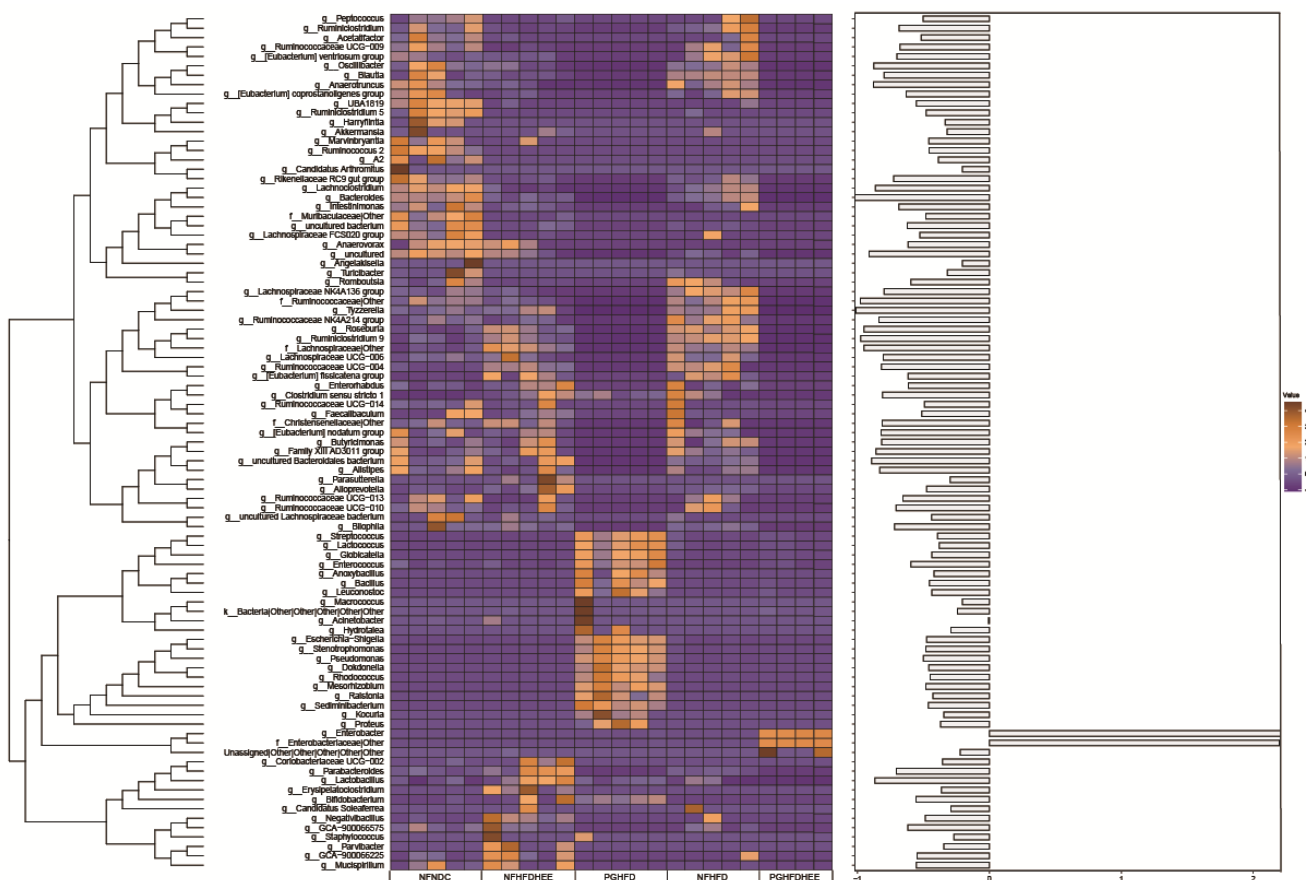

Supplement: s1 [file s1]
